# Supplementary material for: Comparison of the diagnostic performance of digital breast tomosynthesis and magnetic resonance imaging added to digital mammography in women with known breast cancers
Source: Springer Nature journal article supplement (doi:10.1007/s00330-015-3998-3), 2015-09-16
Supplement: MOESM1 [file 8322896]

**Table E1. Sensitivities in women with a single lesion marked vs. non-single lesions marked by radiologists**

|  | Single lesion Marked | | | | Non-single Lesion Marked | | | |
| --- | --- | --- | --- | --- | --- | --- | --- | --- |
| Sensitivity | Radiologist 1 | Radiologist  2 | Radiologist  3 | Pooled Data | Radiologist 1 | Radiologist 2 | Radiologist  3 | Pooled Data |
| Mammography alone | 86.1%  (93/108) | 88%  (95/108) | 88%  (95/108) | 87.3% (283/324) | 61.8%  (47/76) | 61.8%  (47/76) | 72.4%  (55/76) | 65.4%  (149/228) |
| Tomosynthesis plus mammography | 97.2%  (105/108) | 97.2%  (105/108) | 92.6% (100/108) | 95.7% (310/324) | 80.3%  (61/76) | 78.9%  (60/76) | 73.7%  (56/76) | 77.6%  (177/228) |
| MRI plus mammography | 100%  (108/108) | 100%  (108/108) | 100%  (108/108) | 100% (324/324) | 93.4%  (71/76) | 93.4%  (71/76) | 97.4%  (74/76) | 94.7%  (216/228) |
| *P* value* | .0011 | .0027 | .0237 | <.0001 | .0005 | .0004 | .7039 | <.0001 |
| *P* value† | .2500 | .2500 | .0078 | .0001 | .0057 | .0107 | .0005 | .0001 |
